# Supplementary material
Source: PubMed Central journal article supplement (PMC7304821)
Supplement: am0c03148_si_001.pdf [file am0c03148_si_001.pdf]

# Supplementary Information

## Stretchable and Skin-conformable Conductors Based on Polyurethane/Laser-Induced Graphene

*Alexander Dallinger<sup>a</sup>, Kirill Keller<sup>a</sup>, Harald Fitzek<sup>b,c</sup>, Francesco Greco<sup>a,\*</sup>*

*a* Institute of Solid State Physics, NAWI Graz, Graz University of Technology, Petersgasse 16,  
8010 Graz, Austria.

*b* Graz Centre for Electron Microscopy (ZFE), Steyrergasse 17, 8010 Graz, Austria

*c* Institute for Electron Microscopy and Nanoanalysis (FELMI), NAWI Graz, Graz University of  
Technology, Steyrergasse 17, 8010 Graz, Austria

\* Corresponding author, email: [francesco.greco@tugraz.at](mailto:francesco.greco@tugraz.at)

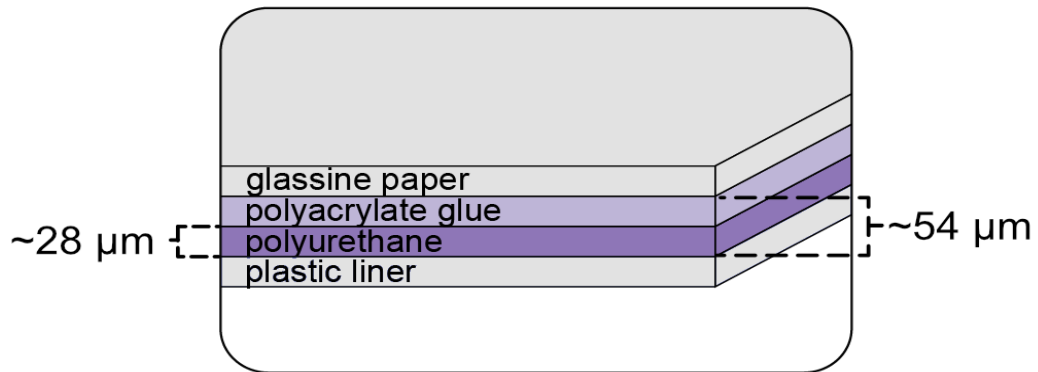

**Figure S1.** Schematics of MPU layers.

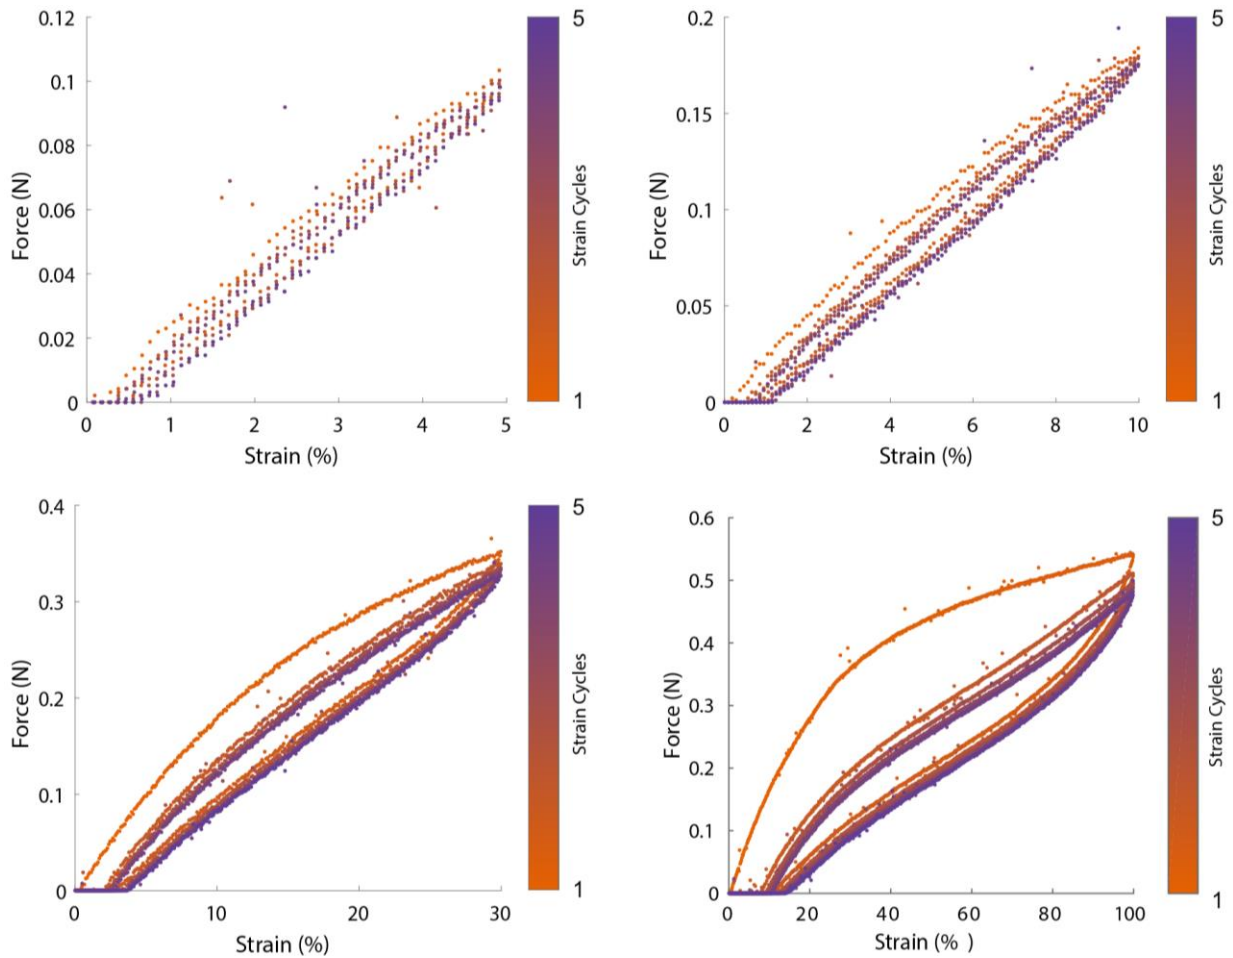

**Figure S2.** Force curves for MPU samples for 5%, 10%, 30% and 100% strain cycles repeated five times.

**Table S1.** Summary of properties of MPU.

| <b>Property</b>     | <b>Value</b>                   |
|---------------------|--------------------------------|
| Thickness           | 54±6 μm                        |
| Young's Modulus     | (8.5 ± 0.3)MPa                 |
| Elongation at break | > 400%                         |
| WVTR <sup>1</sup>   | 564-648 g/m <sup>2</sup> /24 h |

<sup>1</sup>Water Vapor Transmission Rate (WVTR) provided by BSN medical.

**Table S2.** Summary of Raman spectra band parameters.

|                                   | LIG-F  | LIG-P  |
|-----------------------------------|--------|--------|
| G-band position/cm <sup>-1</sup>  | 1587.3 | 1582.0 |
| G-band width/cm <sup>-1</sup>     | 56.2   | 55.4   |
| G-band intensity/counts           | 98.8   | 99.4   |
| D-band position/cm <sup>-1</sup>  | 1344.6 | 1342.6 |
| D-band width/cm <sup>-1</sup>     | 77.7   | 57.8   |
| D-band intensity/counts           | 85.4   | 105.1  |
| D/G-ratio                         | 0.86   | 1.06   |
| 2D-band position/cm <sup>-1</sup> | 2686.7 | 2682.0 |
| 2D-band width/cm <sup>-1</sup>    | 97.7   | 99.9   |
| 2D-band intensity/counts          | 40.0   | 44.3   |

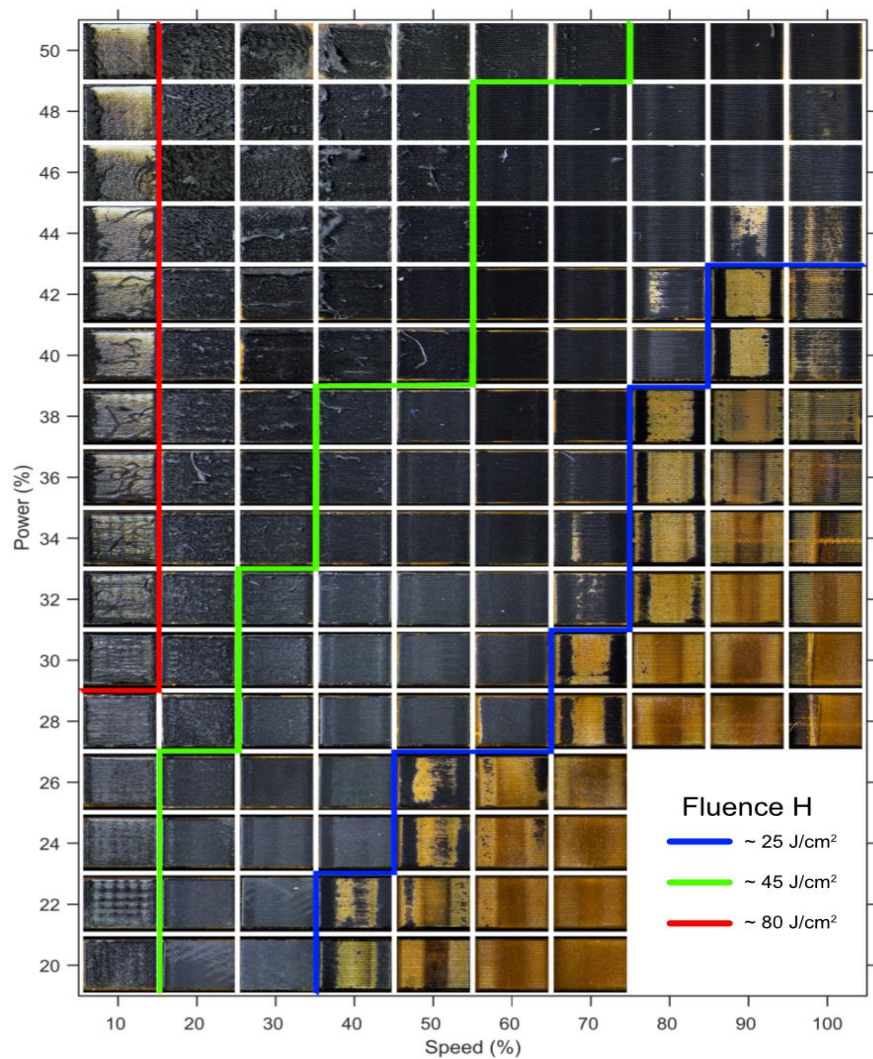

**Figure S3.** Map of LIG formation on PI influenced by laser power and speed parameters, resulting in different fluence H.

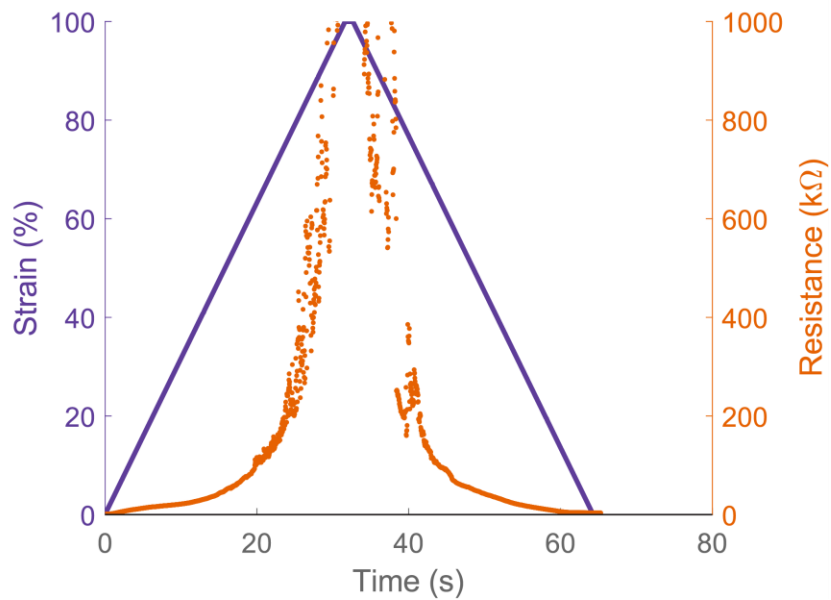

**Figure S4.** Stretching curve for LIG-P/MPU sample with a 100% strain/relaxation cycle and corresponding variation of electrical resistance, showing a reversible breakdown at around 60% strain (plot cut off at 1000 k $\Omega$  for better visibility).

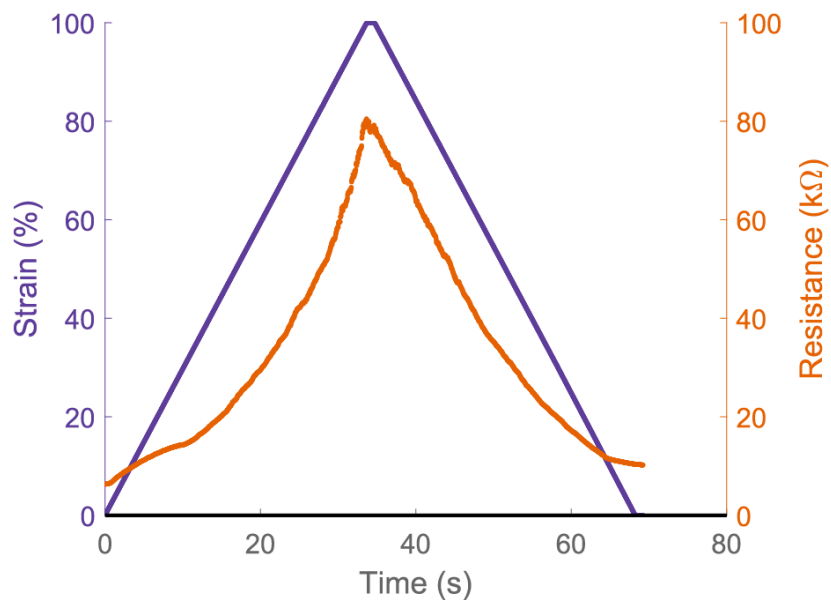

**Figure S5.** Stretching curve for LIG-F/MPU sample with a 100% strain/relaxation cycle and corresponding variation of electrical resistance, showing no breakdown during the full cycle.

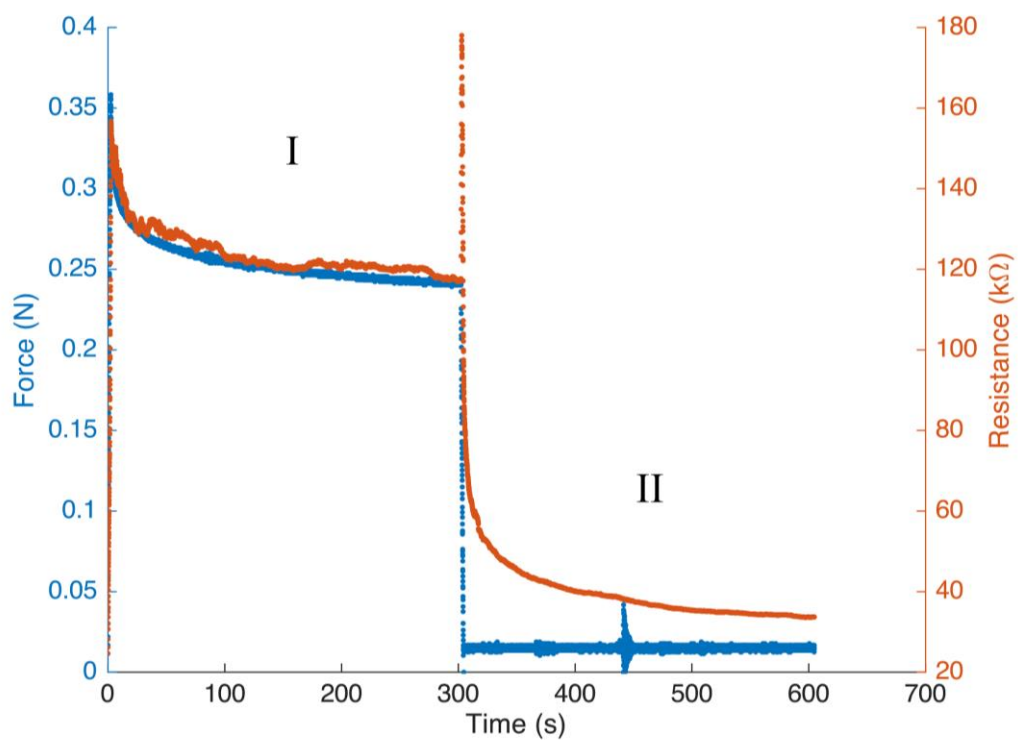

**Figure S6.** Stress relaxation curve from an applied 30% tensile strain on LIG-P/MPU, as used in fitting for the relaxation time constant for the I and II relaxations.

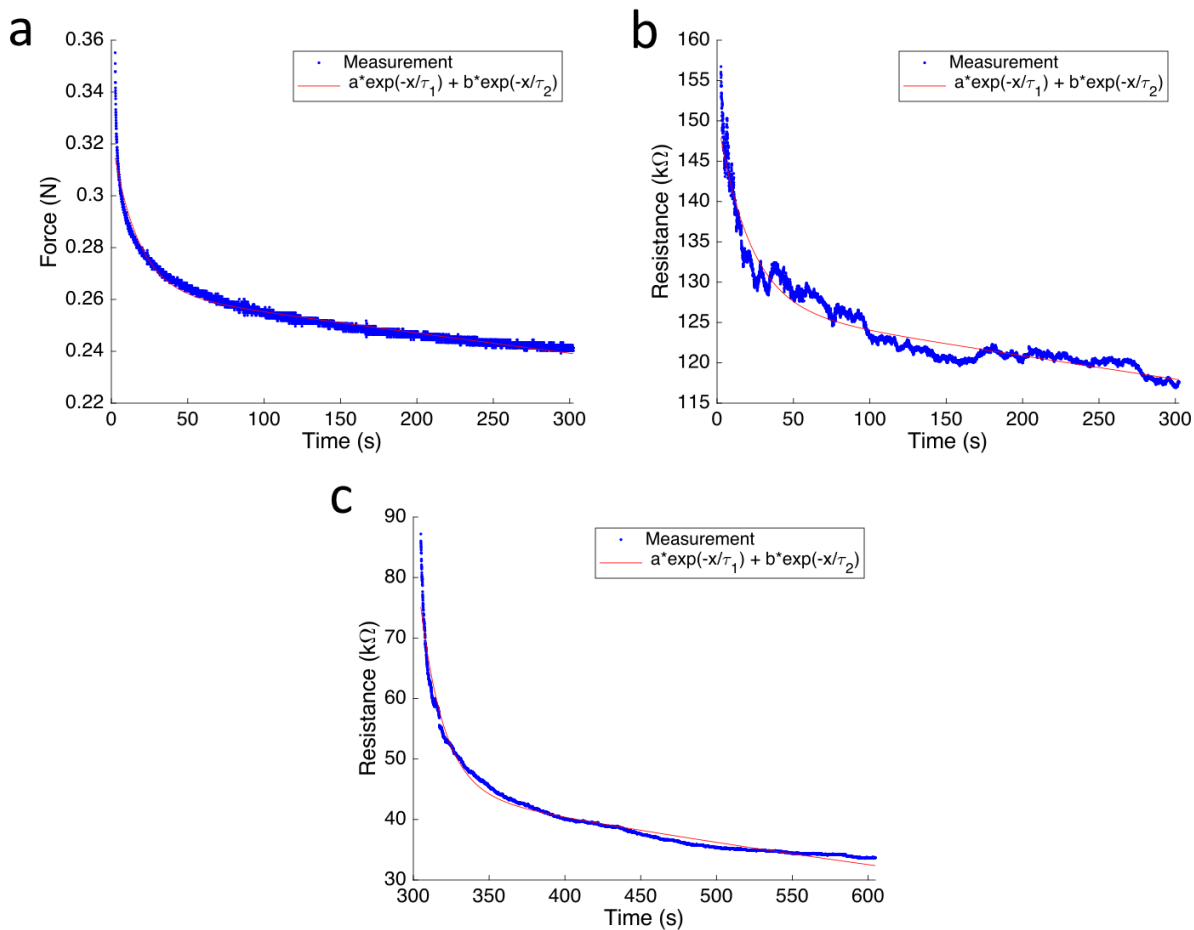

**Figure S7.** Fitting of (a) force and (b) resistance of I relaxation in Figure S6 and fitting of (c) resistance of II relaxation in Figure S6 with two exponential functions ( $a \cdot e^{\frac{-x}{\tau_1}} + b \cdot e^{\frac{-x}{\tau_2}}$ ), resulting in a time constant  $\tau_1 = 18.5 \pm 2.8$  s and  $\tau_2 = 3100 \pm 1400$  s.

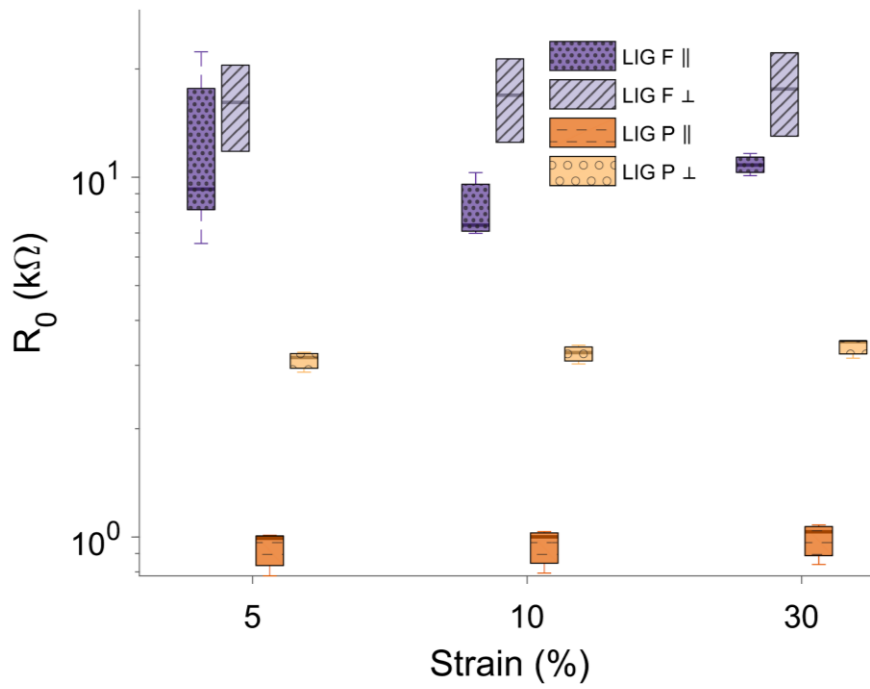

**Figure S8.** Starting resistance  $R_0$  before each strain cycle for all LIG/MPU types.



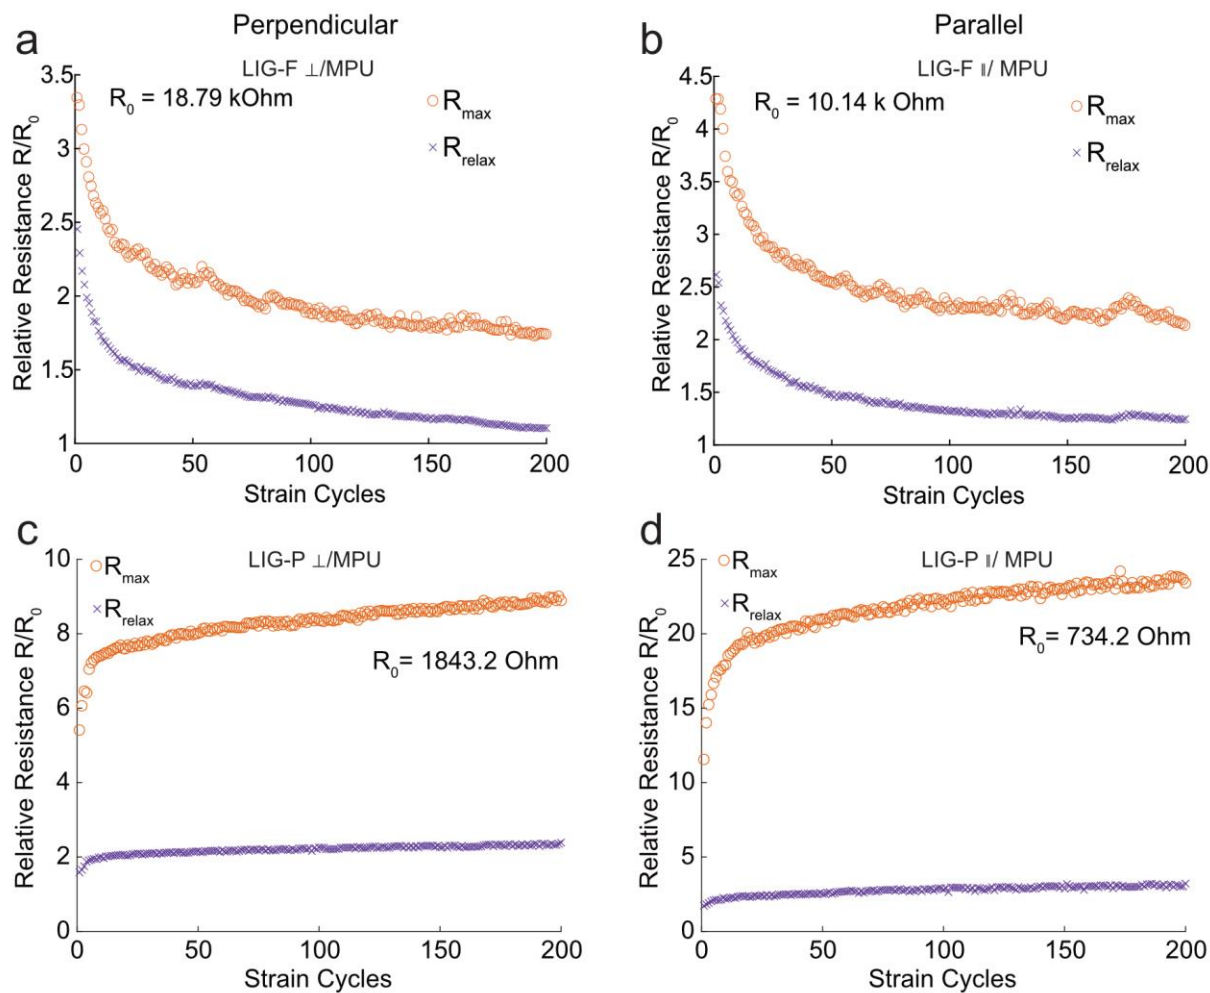

**Figure S9.** Change of maximum resistance  $R_{\max}$  and relaxed resistance  $R_{\text{relax}}$  over 200 cycles of tensile testing at 30% strain in the case of a) LIG-F  $\perp$ /MPU ( $\phi = 90^\circ$ ), b) LIG-F  $\parallel$ /MPU ( $\phi = 0^\circ$ ), c) LIG-P  $\perp$ /MPU ( $\phi = 90^\circ$ ) and d) LIG-P  $\parallel$ /MPU ( $\phi = 0^\circ$ ).

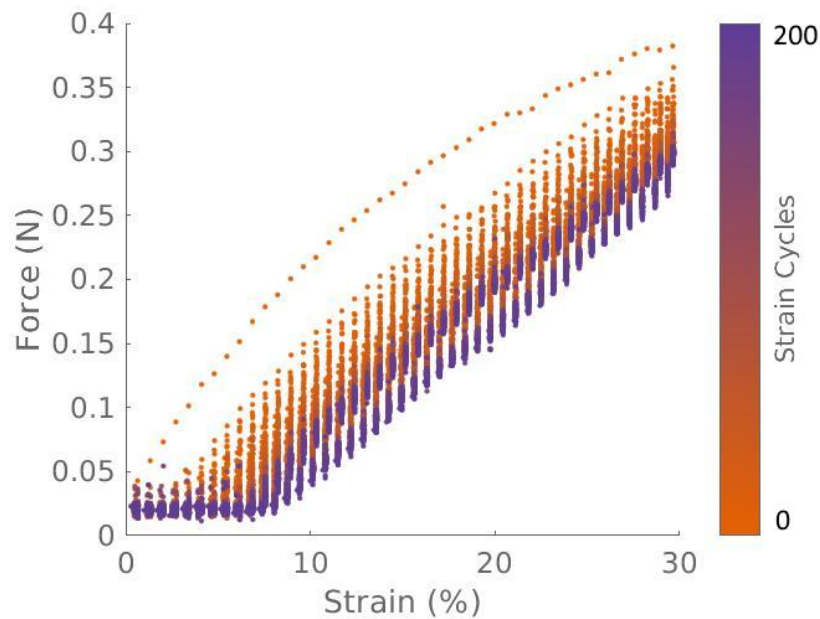

**Figure S10.** Force curve of MPU sample with a strain cycle of 30% imposed 200 times extracted from Figure S9.

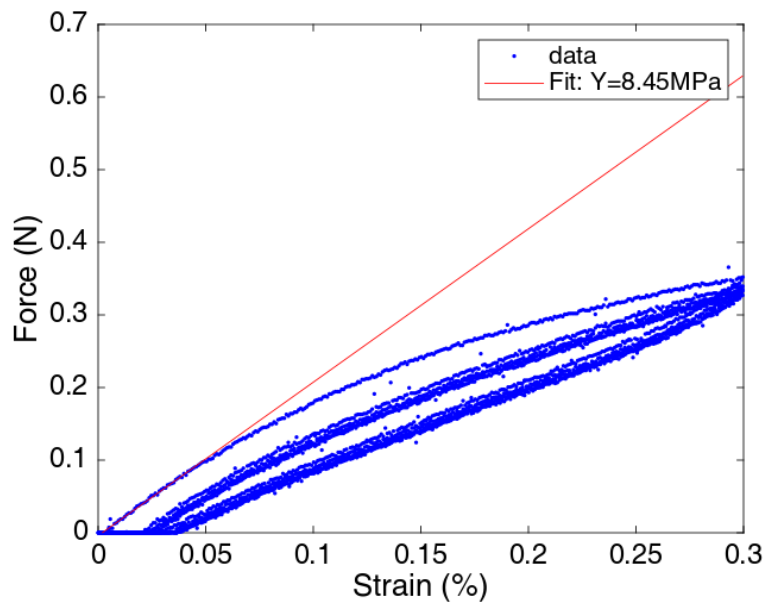

**Figure S11.** Fitting of Young's Modulus ( $Y = 8.5 \pm 0.3$  MPa) for LIG-F/MPU with 30% strain.

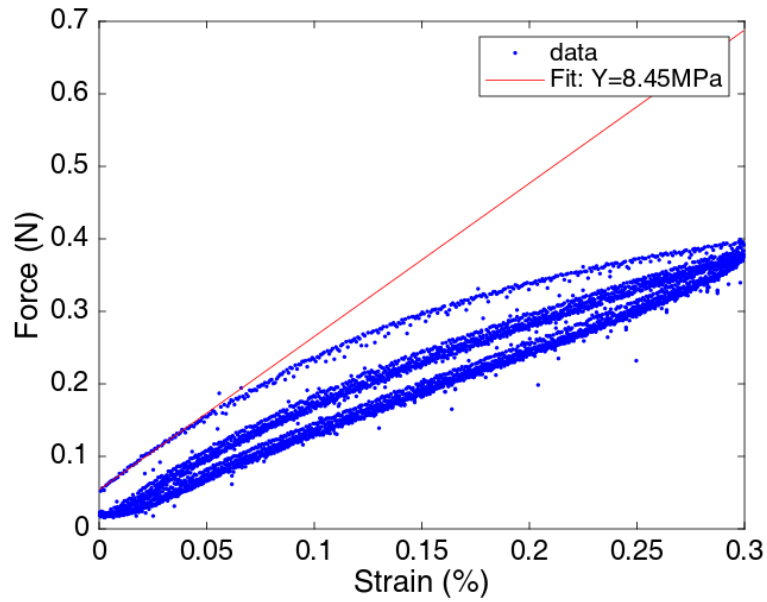

**Figure S12.** Fitting of Young's Modulus ( $Y = 8.5 \pm 0.3$  MPa) for MPU with 30% strain.

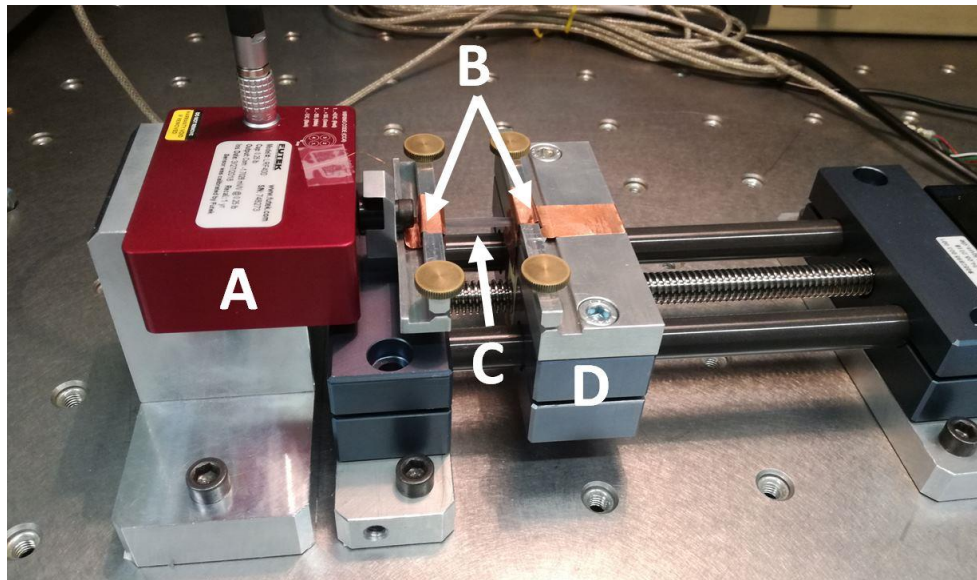

**Figure S13.** Custom tensile testing setup for mechanical and electrical characterization showing (A) load cell, (B) electrical contacts, (C) sample, (D) movable stage.

## Calculation of laser fluence

The laser fluence  $H$  for each laser raster setting was calculated as

$$H = \frac{P \cdot P_{max} / 100}{s \cdot v \cdot PPI} \quad (S1)$$

where  $P$  is the set laser power (%) with respect to the maximal laser power  $P_{max} = 30$  W,  $s$  is the theoretical laser spot size determined according to gaussian beam theory,  $v$  is the measured processing speed (depending on the sample size,  $v \sim 110 \pm 10$  mm/s) and PPI the raster resolution.
